# Supplementary material for: Phase transformation of calcium carbonate in acetonitrile/H2O mixed solvents: effects of water content and dielectric constant
Source: Royal Society of Chemistry journal article supplement (doi:10.1039/d2ce01709a), 2023-01-01
Supplement: d2ce01709a1.pdf [file d2ce01709a1.pdf]

**Supplementary information for:**  
**Phase Transformation of Calcium Carbonate in  
Acetonitrile/H<sub>2</sub>O Mixed Solvents: Effect of Water Content and  
Dielectric Constant**

Wenwu Zou,<sup>ab</sup> Zhenze Xie<sup>ac</sup> Chang Du<sup>\* abc</sup>

<sup>a</sup> School of Materials Science and Engineering, South China University of Technology, Guangzhou, 510641, China;

<sup>b</sup> National Engineering Research Center for Tissue Restoration and Reconstruction, South China University of Technology, Guangzhou, 510006, China;

<sup>c</sup> Key Laboratory of Biomedical Materials and Engineering of the Ministry of Education, South China University of Technology, Guangzhou 510006, China.

\* Corresponding author, E-mail: [duchang@scut.edu.cn](mailto:duchang@scut.edu.cn).

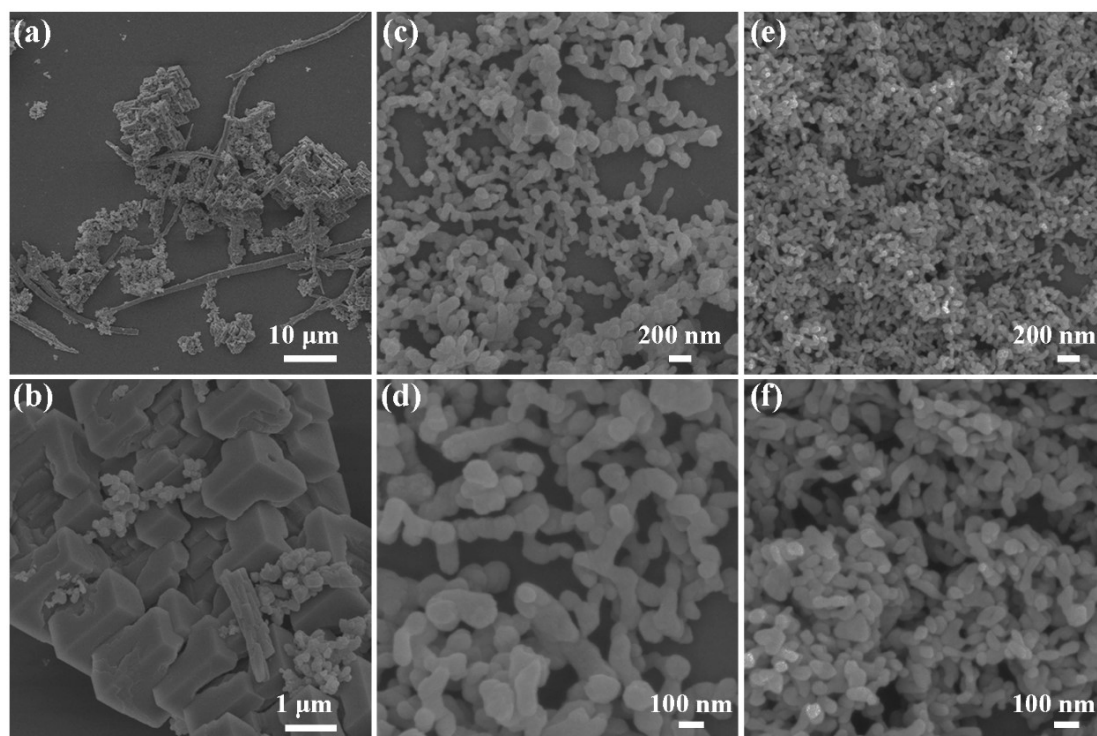

Figure s1 SEM images of calcium carbonate crystals formed in 80%, 90% and 95% Ace (v/v) mixed solvents, reaction time = 1 d; (b), (d) and (f) are local enlarged diagrams of (a), (c) and (e) respectively.

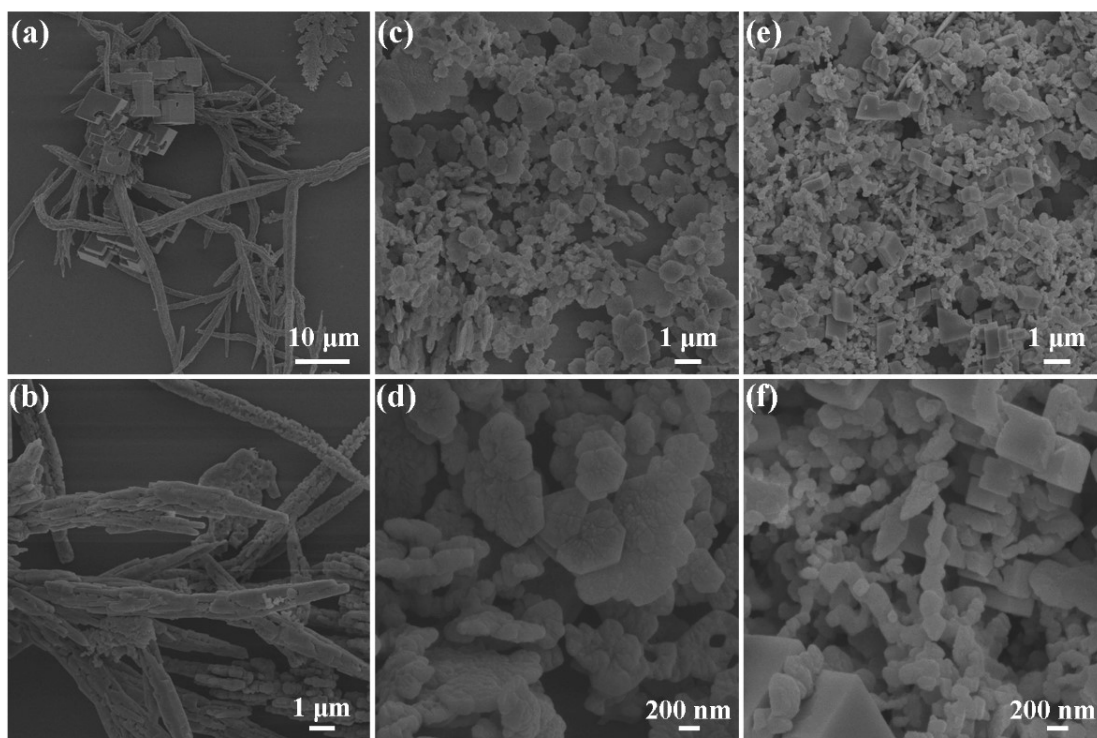

Figure s2 SEM images of calcium carbonate crystals formed in 80%, 90% and 95% Ace (v/v) mixed solvents, reaction time = 3 d; (b), (d) and (f) are local enlarged diagrams of (a), (c) and (e) respectively.

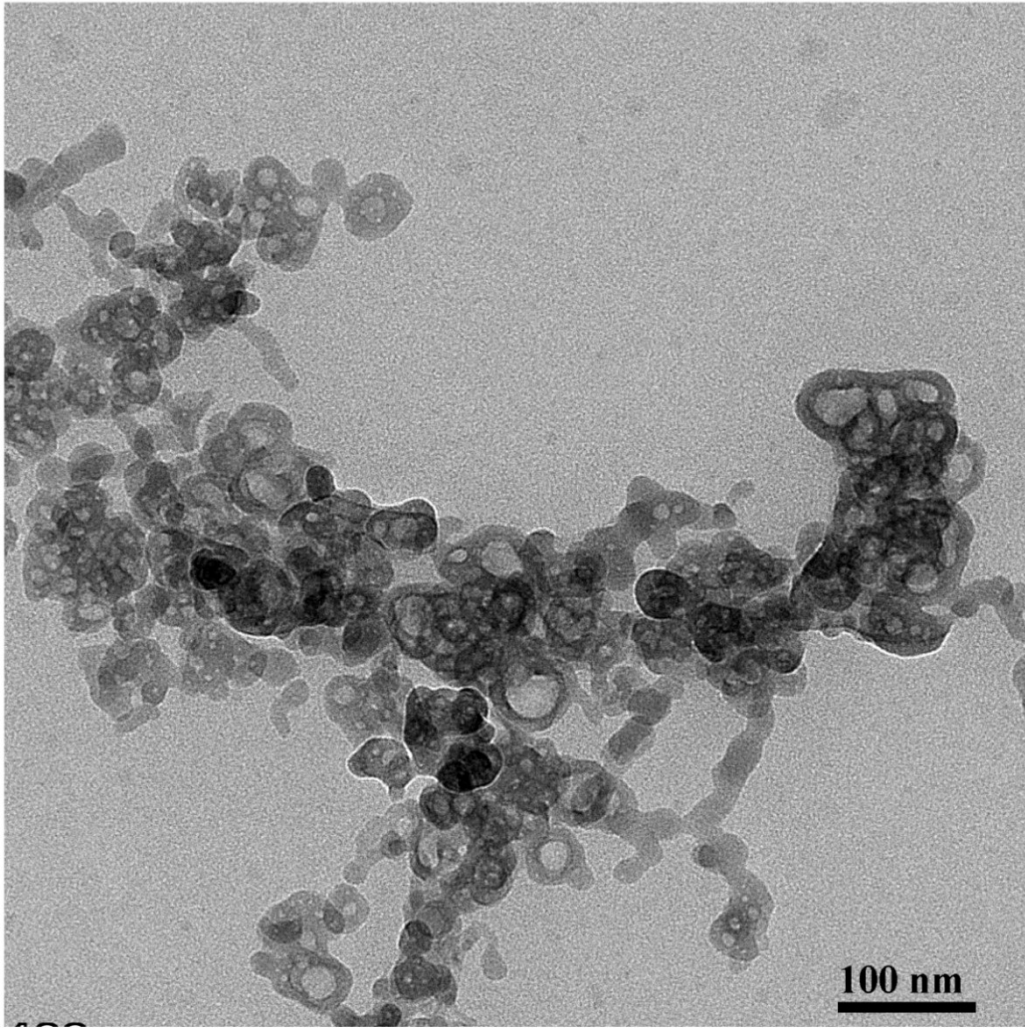

Figure s3 SEM images of ACC with hollow structure formed in 95% Ace (v/v) mixed solvents, reaction time = 3 h.
